# Supplementary material for: Optimization and life-cycle assessment of biochar production through microwave–assisted pyrolysis of industrial hemp hurd
Source: Research Square preprint supplement (doi:10.21203/rs.3.rs-8918479/v1), 2026-02-20
Supplement: Supplementary file 1 [file e6a219099ed08bcc1f058fe8.docx]

Optimization and Life-Cycle Assessment of Biochar Production through Microwave–Assisted Pyrolysis of Industrial Hemp Hurd

Nived S Menon1, Rejeti Venkat Srinadh1, Neelancherry Remya1*

1School of Infrastructure, Indian Institute of Technology Bhubaneswar, Argul, Odisha, 752050, India.

*Corresponding author: [remya@iitbbs.ac.in](mailto:remya@iitbbs.ac.in)

# Figures


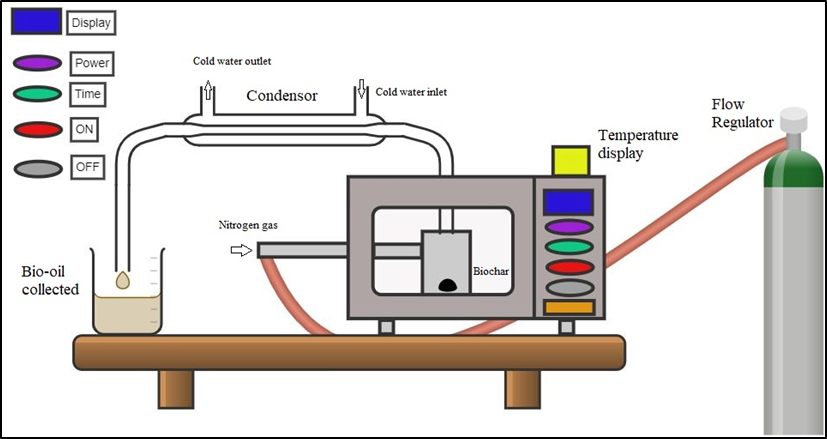


**Fig. 1** Schematic diagram of MAP setup

# Tables

**Table S1.** Fit summary of developed model for HB yield and HHV

|  | **Linear** | | **2FI** | | **Quadratic** | | **Cubic** | | **Lack of Fit** | |
| --- | --- | --- | --- | --- | --- | --- | --- | --- | --- | --- |
| ***p-*value** | **R2** | ***p-*value** | **R2** | ***p-*value** | **R2** | ***p-*value** | **R2** | ***F-*value** | ***p-*value** |
| **HB yield** | 0.0002 | 0.81 | 0.2024 | 0.84 | < 0.0001 | 0.99 | 0.1140 | 0.99 | 3.82 | 0.1140 |
| **HHV** | 0.0059 | 0.57 | 0.7392 | 0.53 | < 0.0001 | 0.98 | 0.1031 | 0.99 | 4.10 | 0.1031 |

**Table S2** Validation of the model for HB yield and HHV

| **MW Power (W)** | **Time (min)** | **HB yield (%)** | | | **HHV (MJ/kg)** | | |
| --- | --- | --- | --- | --- | --- | --- | --- |
| **Observed** | **Predicted** | **Error** | **Observed** | **Predicted** | **Error (%)** |
| 700 | 17.5 | 35.2 | 29.7 | 5.5 | 13.0 | 12.2 | 6.5 |
| 500 | 10 | 88.6 | 93.7 | 5.1 | 14.4 | 14.8 | 2.7 |
| 1000 | 15 | 8.7 | 12.5 | 3.8 | 25.4 | 27.2 | 6.6 |
| *Average Error* | | | | 4.8 |  |  | 5.2 |

**Table S3** Various solutions based on the optimization of biochar yield and HHV

| **Number** | **MP (W)** | **Residence time (mins)** | **Yield (%)** | **HHV (MJ/kg)** | **Desirability** |
| --- | --- | --- | --- | --- | --- |
| 1 | 1000 | 7 | 37.6 | 24.9 | 0.52 |
| 2 | 500 | 12.3 | 75.3 | 15.1 | 0.38 |
| 3 | 500 | 12.8 | 77.9 | 15.1 | 0.38 |
| 4 | 1000 | 30 | 16.8 | 29.5 | 0.31 |

**Table S4.** Data related to EF estimation

| Feedstock Type | Woody residue |
| --- | --- |
| Carbonization Method | Closed carbonization (MAP) |
| Carbonization Scale | Unspecified |
| Amount of HH (MHH) | 100 t/yr |
| Moisture content of HH (m) | 9.85 % |
| EF (without surplus energy utilization) [Class 6] | 0.10 |
| EF (with surplus energy utilization) [Class 17] | -0.78 |
| HB yield in terms of dry weight of HH | 41.7 % |
| Scenario specific annual HB Production (MHB) | 4.11 t/yr |
| Utilization rate (u) | 100 % |

**Table S5.** Impact result using ReCiPe Midpoint (H)

| **Name** | **Impact result** | **Unit** |
| --- | --- | --- |
| Fine particulate matter formation | 0.66 | kg PM2.5 eq. |
| Fossil resource scarcity | 28.23 | kg oil eq. |
| Freshwater ecotoxicity | 4.92 | kg 1,4-DCB |
| Freshwater eutrophication | 0.16 | kg P eq. |
| Global warming | 167.35 | kg CO2 eq. |
| Human carcinogenic toxicity | 4.96 | kg 1,4-DCB |
| Human non-carcinogenic toxicity | 3199.92 | kg 1,4-DCB |
| Ionizing radiation | 5.38 | kBq Co-60 eq. |
| Land use | 1437.69 | m2a crop eq. |
| Marine ecotoxicity | 7.39 | kg 1,4-DCB |
| Marine eutrophication | 1.14 | kg N eq. |
| Mineral resource scarcity | 18.94 | kg Cu eq. |
| Ozone formation, Human health | 2.01 | kg NOx eq. |
| Ozone formation, Terrestrial ecosystems | 2.63 | kg NOx eq. |
| Stratospheric ozone depletion | 0.003 | kg CFC11 eq. |
| Terrestrial acidification | 3.99 | kg SO2 eq. |
| Terrestrial ecotoxicity | 2380.14 | kg 1,4-DCB |
| Water consumption | 0.78 | m3 |

**Table S6.** Environmental impacts by different stages of HB production

| **Groups** | **Global warming potential**  (kg CO2 eq.) | **Ozone depletion**  **(**kg CFC-11-eq.) | **Photochemical oxidant**  (kg ethylene-eq.) | **Acidification** (kg SO2-eq.) | **Eutrophication**  **(**kg P-eq.) |
| --- | --- | --- | --- | --- | --- |
| Hemp farming | -2.94 | 0 | 1.11*10-3 | 9.13*10-3 | 0 |
| Harvesting | 80.83 | 1.11*10-8 | 0.13 | 4.50 | 3.13*10-2 |
| Transportation | 47.83 | 3.53*10-7 | 0.28 | 0.36 | 1.04*10-3 |
| MAP | 0 | 0 | 1.99 | 0 | 0 |
| Allied | 37.48 | 1.35*10-5 | 5.32*10-2 | 0.18 | 4.29*10-2 |

**Table S7.** Sensitivity analysis

|  |  | **Hemp farming** | **Harvest** | **Transportation** | **Electricity** | **MAP** | **Allied** |
| --- | --- | --- | --- | --- | --- | --- | --- |
| **Global warming potential**  (kg CO2 Eq) | **EDIP** | -2.94 | 80.31 | 48.14 | 0.08 | 49.58 | 37.67 |
| **CML 2001** | -2.94 | 80.83 | 47.96 | 0.08 | 0 | 37.64 |
| **ReCiPe Midpoint (H)** | -2.94 | 80.83 | 47.83 | 0.08 | 0 | 37.48 |
| **ILCD 2.0 2018** | -2.94 | 80.83 | 47.98 | 0.10 | 0 | 38.62 |
| **Ozone depletion**  **(**kg CFC-11-Eq) | **EDIP** | 0 | 1.06*10-8 | 3.24*10-7 | 4.27*10-10 | 0 | 1.21*10-5 |
| **CML 2001** | 0 | 1.11*10-8 | 3.53*10-7 | 4.88*10-10 | 0 | 1.35*10-5 |
| **ReCiPe Midpoint (H)** | 0 | 1.11*10-8 | 3.53*10-7 | 4.89*10-10 | 0 | 1.35*10-5 |
| **ILCD 2.0 2018** | 0 | 1.40*10-8 | 4.34*10-7 | 5.69*10-10 | 0 | 1.63*10-5 |
| **Photo-chemical oxidant**  (kg ethylene-Eq) | **EDIP** | - | - | - | - | - | - |
| **CML 2001** | 0 | 1.22*10-5 | 3.21*10-3 | 1.16*10-5 | 2.84 | 1.23*10-2 |
| **ReCiPe Midpoint (H)** | 1.11*10-3 | 0.13 | 0.28 | 1.95*10-5 | 1.99 | 5.32*10-2 |
| **ILCD 2.0 2018** | 1.11*10-3 | 0.13 | 0.28 | 1.95*10-5 | 1.99 | 5.32*10-2 |
| **Acidification** (kg SO2-Eq) | **EDIP** | 7.86*10-3 | 3.53 | 0.45 | 3.06*10-5 | 0 | 0.19 |
| **CML 2001** | 6.32*10-3 | 2.98 | 0.33 | 2.78*10-5 | 0 | 0.20 |
| **ReCiPe Midpoint (H)** | 9.13*10-3 | 4.50 | 0.36 | 2.72*10-5 | 0 | 0.18 |
| **ILCD 2.0 2018** | 1.13*10-2 | 5.56 | 0.48 | 3.57*10-5 | 0 | 0.24 |
| **Eutro-phication**  ($kg PO4-Eq, &kg P-Eq) | **EDIP** | - | - | - | - | - | - |
| $**CML 2001** | 1.50*10-3 | 2.46 | 8.15*10-2 | 1.02*10-5 | 0 | 5.61*10-2 |
| &**ReCiPe Midpoint (H)** | 0 | 3.13*10-2 | 1.04*10-3 | 6.75*10-6 | 0 | 4.29*10-2 |
| &**ILCD 2.0 2018** | 0 | 3.13*10-2 | 1.03*10-3 | 6.74*10-6 | 0 | 4.28*10-2 |
